# Supplementary material for: Use of Cyanobacterial Luminescent Bioreporters to Report on the Environmental Impact of Metallic Nanoparticles
Source: PubMed Central journal article supplement (PMC6721232; doi:10.3390/s19163597), 2019-08-19
Supplement: sensors-19-03597-s001.pdf [file sensors-19-03597-s001.pdf]

**Supplementary material**

**Table 1.** Dissolved free-ion concentration released from each metallic NP as calculated by TXRF after 24 h of exposure in AA/8+N medium and percentage of released free-ion metals with respect to the nominal NP concentration.

| Metallic NP      | Nominal Concentration (mg/L) | Concentration Measure by TXRF (mg/L) | % of Released Free-Ion |
|------------------|------------------------------|--------------------------------------|------------------------|
| AgO              | 10                           | 0.04 (Ag <sup>+</sup> )              | 0.41                   |
| TiO <sub>2</sub> | 100                          | 0 (Ti <sup>4+</sup> )                | 0                      |
| ZnO              | 100                          | 3.56 (Zn <sup>2+</sup> )             | 1.12                   |
| CuO              | 100                          | 3.66 (Cu <sup>2+</sup> )             | 1.12                   |

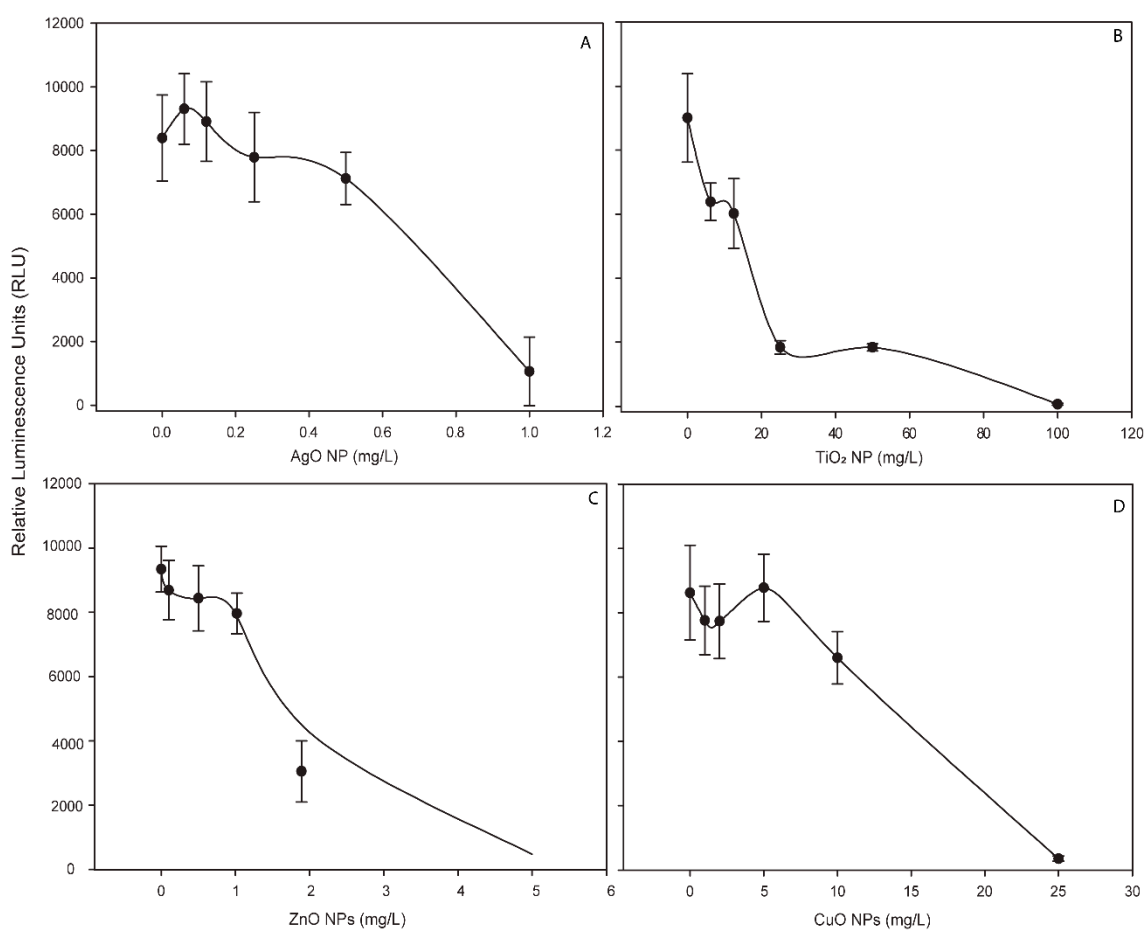

**Figure S1.** Dose–response curves of the bioluminescence of *Nostoc* sp. CPB4337 after 24 h of exposure to increasing concentrations of metallic NPs. RLU: relative luminescence units.

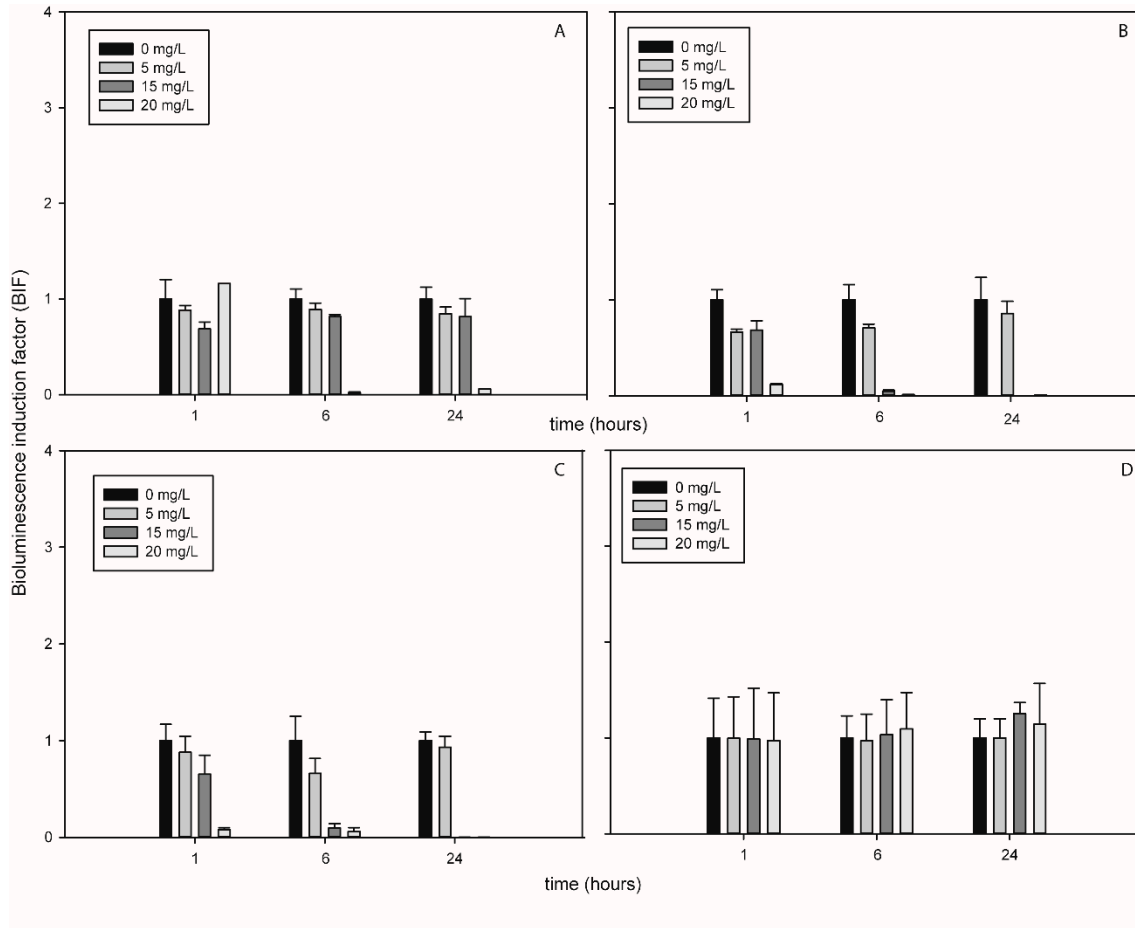

**Figure S2.** Bioluminescence induction of ROS-detecting *Nostoc* sp. PCC7120 bioreporters exposed to 0, 5, 15 and 20 mg/L of CuO NPs after 1, 6 and 24 h of exposure. (A) *Nostoc* sp. PCC7120 pBG2154, (B) *Nostoc* sp. PCC7120 pBG2165, (C) *Nostoc* sp. PCC7120 pBG2172 and (D) *Nostoc* sp. PCC7120 pBG2173. No significant differences ( $p < 0.05$ ) were observed at any of the assayed times.
